# Supplementary material for: Th17 cytokines and factors modulating their activity in patients with pernicious anemia
Source: Springer Nature journal article supplement (doi:10.1007/s12026-023-09399-9), 2023-06-03
Supplement: MOESM1 [file 12026_2023_9399_MOESM1_ESM.pdf]

**Th17 cytokines and factors modulating their activity in patients with pernicious anemia**

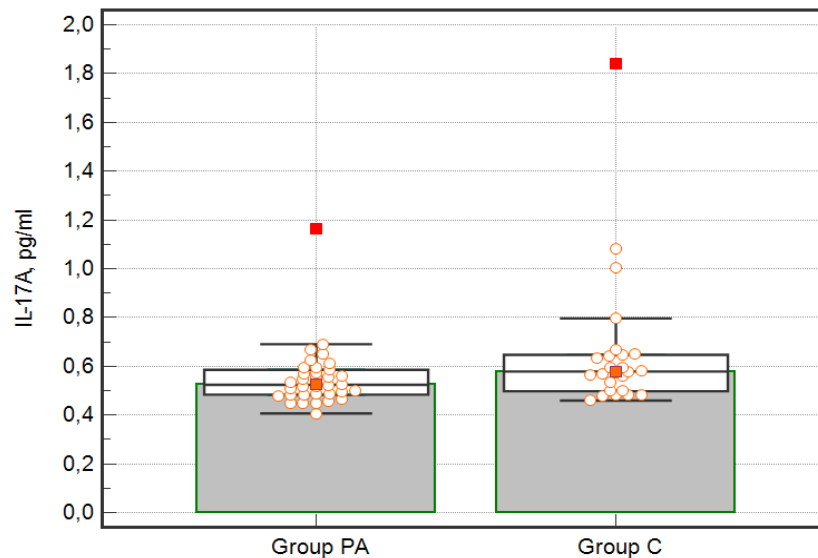

**Fig. 1S** The concentration of IL-17A in the blood of PA patients and healthy controls (C).

The difference between the groups is statistically significant. The median and quartiles 25% and 75% are presented (Mann-Whitney *U* test).

<sup>1</sup>Dariusz Kajdaniuk\*, <sup>2</sup>Wanda Foltyn, <sup>3</sup>Elżbieta Morawiec-Szymonik, <sup>4</sup>Zenon Czuba, <sup>5</sup>Ewa Szymonik, <sup>2</sup>Beata Kos-Kudła, <sup>1</sup>Bogdan Marek

<sup>1</sup>Department of Pathophysiology, Chair of Pathophysiology and Endocrinology, Medical University of Silesia, Katowice, Poland

<sup>2</sup>Department of Endocrinology and Neuroendocrine Tumors, Chair of Pathophysiology and Endocrinology, Medical University of Silesia, Katowice, Poland

<sup>3</sup>Department of Internal Medicine and Oncological Chemotherapy, Andrzej Mielęcki Independent Public Clinical Hospital, Katowice, Poland

<sup>4</sup>Department of Microbiology and Immunology, Medical University of Silesia, Katowice, Poland

<sup>5</sup>Department of Anesthesiology and Intensive Care, Stanislaw Szyszko Independent Public Clinical Hospital No. 1, Zabrze, Poland

\*corresponding author:

[dkajdaniuk@sum.edu.pl](mailto:dkajdaniuk@sum.edu.pl)
